# Supplementary material for: Temperature dependence of emission product distribution from vaping of vitamin E acetate
Source: PubMed Central journal article supplement (PMC8947410; doi:10.1371/journal.pone.0265365), 2022-03-24
Supplement: pone.0265365.s002.pdf [file pone.0265365.s002.pdf]

*Supporting Information*

**Temperature Dependence of Emission Product Distribution from Vaping of Vitamin E Acetate**

Alexa Canchola<sup>1¶</sup>, Ruth Meletz<sup>2¶</sup>, Riste Ara Khandakar<sup>2&</sup>, Megan Woods<sup>3&</sup>, Ying-Hsuan Lin<sup>1,2\*</sup>

<sup>1</sup>Environmental Toxicology Graduate Program, University of California, Riverside, CA, USA

<sup>2</sup>Department of Environmental Sciences, University of California, Riverside, CA, USA

<sup>3</sup>Department of Chemistry, University of California, Riverside, CA, USA

\*Corresponding Author

Email: [ying-hsuan.lin@ur.edu](mailto:ying-hsuan.lin@ur.edu)

¶These authors contributed equally to this work.

&These authors also contributed equally to this work

Number of Pages: 11

Number of Tables: 2

Number of Figures: 7

# **S1. Materials and Methods**

## **S1.1 QCEIMS**

The simulated electron impact (EI) mass spectrum for 1-pristene was generated using the Quantum Chemical Electron Ionization Mass Spectra (QCEIMS) program [1, 2]. The molecule of interest was visualized using Gaussview 6. The geometry of the investigated systems was optimized using the DFT/ 6-31G(d) level of theory with a hybrid functional B3LYP. To make the constructed systems interests compatible with QCEIMS, 3-D coordinates were extracted from the optimized (\*.log) output files and converted to Turbmole format (\*.tmol) format using Openbabel. The cartesian coordinates of the optimized 1-pristene structure can be found in Table S2.

Within QCEIMS, the standalone method GFN-xTB2 method with D4/SV(P) basis set was used for the molecular dynamic calculations. Each system was run with the following parameters: 70 eV ionization energy, 500 K initial temperature, 0.25 femtomsecond time steps with 1425 parallel cluster runs and an impact excess energy (IEE)/atom of 0.6eV. The theoretical spectra were exported using the QCEIMS plotms program and visualized with a python script.

1 **Table S1. Summary of VEA vaping emission products.**

| Name                                     | Formula                                        | M.W. <sup>a</sup> | CAS #      | Structure | EIC      | Average NIST Match Score <sup>c</sup> |
|------------------------------------------|------------------------------------------------|-------------------|------------|-----------|----------|---------------------------------------|
| <b>DL-alpha tocopherol acetate (VEA)</b> | C <sub>31</sub> H <sub>52</sub> O <sub>3</sub> | 472.7             | 58-95-7    |           | 472, 430 | 902                                   |
| <b>DL-alpha tocopherol (VE)</b>          | C <sub>29</sub> H <sub>50</sub> O <sub>2</sub> | 430.7             | 10191-41-0 |           | 205      | 895                                   |
| <b>Duroquinone</b>                       | C <sub>10</sub> H <sub>12</sub> O <sub>2</sub> | 164.2             | 527-17-3   |           | 121      | 892                                   |
| <b>1-Pristene<sup>d</sup></b>            | C <sub>19</sub> H <sub>38</sub>                | 266.5             | 2140-82-1  |           | 111, 266 | N/A                                   |
| <b>1-Dodecanol, 3,7,11-trimethyl</b>     | C <sub>15</sub> H <sub>32</sub> O              | 228.41            | 6750-34-1  |           | 111      | 856                                   |
| <b>1-Heptene, 2,6-dimethyl</b>           | C <sub>9</sub> H <sub>18</sub>                 | 126.24            | 3074-78-0  |           | 69, 126  | 848                                   |
| <b>1-Undecene, 4-methyl</b>              | C <sub>12</sub> H <sub>24</sub>                | 168.32            | 74630-39-0 |           | 57, 126  | 800                                   |
| <b>1-Heptene, 2-methyl</b>               | C <sub>8</sub> H <sub>16</sub>                 | 112.21            | 15870-10-7 |           | 56, 112  | 801                                   |
| <b>Durohydroquinone</b>                  | C <sub>10</sub> H <sub>14</sub> O <sub>2</sub> | 166.22            | 527-18-4   |           | 164      | 890                                   |
| <b>1-Decene, 4-methyl</b>                | C <sub>11</sub> H <sub>22</sub>                | 154.29            | 13151-29-6 |           | 71, 112  | 839                                   |
| <b>2,6,10-trimethylundeca-1,3-diene</b>  | C <sub>14</sub> H <sub>26</sub>                | 194.36            | 20056-22-8 |           | 109      | 817                                   |

|                                                        |                   |        |             |                                                                                     |         |     |
|--------------------------------------------------------|-------------------|--------|-------------|-------------------------------------------------------------------------------------|---------|-----|
| <b>Benzaldehyde, 2-hydroxy-4-methoxy-3,6-dimethyl</b>  | $C_{10}H_{12}O_3$ | 180.2  | 34883-15-3  | 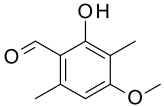 | 180     | 823 |
| <b>3,7,11,15-Tetramethyl-2-hexadecen-1-ol (Phytol)</b> | $C_{20}H_{40}O$   | 296.5  | 150-86-7    |  | 123     | 804 |
| <b>Dodecane, 2,6,10-trimethyl</b>                      | $C_{15}H_{32}$    | 212.41 | 3891-98-3   |  | 71, 85  | 832 |
| <b>1,4-Benzenediol, 2,3,5-trimethyl</b>                | $C_9H_{12}O_2$    | 152.19 | 700-13-0    |  | 152     | 836 |
| <b>2,6-Dimethyl-1,6-heptadiene</b>                     | $C_9H_{16}$       | 124.22 | 51708-83-9  |  | 109     | 876 |
| <b>1-Octene, 3,7-dimethyl</b>                          | $C_{10}H_{20}$    | 140.27 | 4984-01-04  |  | 55, 140 | 853 |
| <b>1-Octene, 3-methyl</b>                              | $C_9H_{18}$       | 126.24 | 13151-08-01 |  | 55, 70  | 813 |

2 Summary of compounds identified from VEA vaping emission at each temperature. Information for each compound was obtained from

3 PubChem [3].

4 <sup>a</sup>M.W.: Molecular Weight ( $g\ mol^{-1}$ )

5 <sup>b</sup>EIC: extracted ion chromatograph; ion selected for quantification

6 <sup>c</sup>Average match score over all collections

7 <sup>d</sup>tentative identification based on QCEIMS

8

9 **Table S2. Cartesian Coordinates for optimized 1-pristene structure calculated by DFT/B3LYP/6-31G(d) level of theory using**  
10 **Gaussian 16W.**

|   |         |         |         |
|---|---------|---------|---------|
| C | 1.4556  | 2.5588  | -0.4419 |
| C | 0.1548  | 2.5618  | 0.3875  |
| C | -1.0279 | 1.8209  | -0.2468 |
| C | -3.5385 | 1.3131  | -0.0081 |
| C | -2.2859 | 1.9557  | 0.6197  |
| C | 2.1424  | 1.1834  | -0.5674 |
| C | 2.3946  | 0.5004  | 0.7801  |
| C | -3.3939 | -0.1882 | -0.3362 |
| C | 3.0745  | -0.869  | 0.6531  |
| C | 1.2248  | 3.1483  | -1.8381 |
| C | -3.1609 | -1.0999 | 0.8754  |
| C | -4.7563 | 1.5737  | 0.8849  |
| C | 4.4851  | -0.8724 | 0.0339  |
| C | -2.9747 | -2.5739 | 0.4878  |
| C | 5.0206  | -2.3064 | -0.0179 |
| C | 5.4639  | 0.0175  | 0.8     |
| C | -1.8207 | -2.8385 | -0.4504 |
| C | -0.443  | -2.5224 | 0.0546  |
| C | -2.0145 | -3.3627 | -1.6705 |
| H | 2.158   | 3.2241  | 0.0791  |
| H | 0.3402  | 2.1775  | 1.3962  |
| H | -0.1409 | 3.6105  | 0.5312  |
| H | -0.7624 | 0.7681  | -0.3705 |
| H | -1.2459 | 2.2263  | -1.2402 |
| H | -3.727  | 1.8254  | -0.9616 |
| H | -2.0951 | 1.5249  | 1.6099  |
| H | -2.4872 | 3.0225  | 0.7836  |
| H | 1.5337  | 0.5206  | -1.1952 |
| H | 3.0942  | 1.3243  | -1.0927 |

|   |         |         |         |
|---|---------|---------|---------|
| H | 1.4397  | 0.3266  | 1.2883  |
| H | 2.9791  | 1.1582  | 1.4324  |
| H | -4.3073 | -0.5205 | -0.8474 |
| H | -2.5885 | -0.3114 | -1.0677 |
| H | 3.1233  | -1.3144 | 1.6556  |
| H | 2.4275  | -1.5257 | 0.0587  |
| H | 0.7095  | 4.1125  | -1.7772 |
| H | 2.1829  | 3.3172  | -2.342  |
| H | 0.6359  | 2.4797  | -2.4738 |
| H | -4.0164 | -1.0369 | 1.5575  |
| H | -2.2852 | -0.7625 | 1.4402  |
| H | -4.943  | 2.6496  | 0.9733  |
| H | -4.6115 | 1.1804  | 1.8961  |
| H | -5.6566 | 1.1152  | 0.4628  |
| H | 4.4258  | -0.5093 | -0.9988 |
| H | -3.9131 | -2.9391 | 0.0505  |
| H | -2.8218 | -3.162  | 1.4017  |
| H | 5.1201  | -2.7309 | 0.987   |
| H | 6.0048  | -2.3371 | -0.4974 |
| H | 4.3494  | -2.9518 | -0.5944 |
| H | 5.5127  | -0.2643 | 1.8573  |
| H | 5.1748  | 1.0711  | 0.7395  |
| H | 6.473   | -0.0651 | 0.3818  |
| H | 0.3325  | -2.8176 | -0.6603 |
| H | -0.3302 | -1.4514 | 0.2388  |
| H | -0.2497 | -3.0576 | 0.9899  |
| H | -3.0093 | -3.6015 | -2.0314 |
| H | -1.1832 | -3.5626 | -2.3382 |

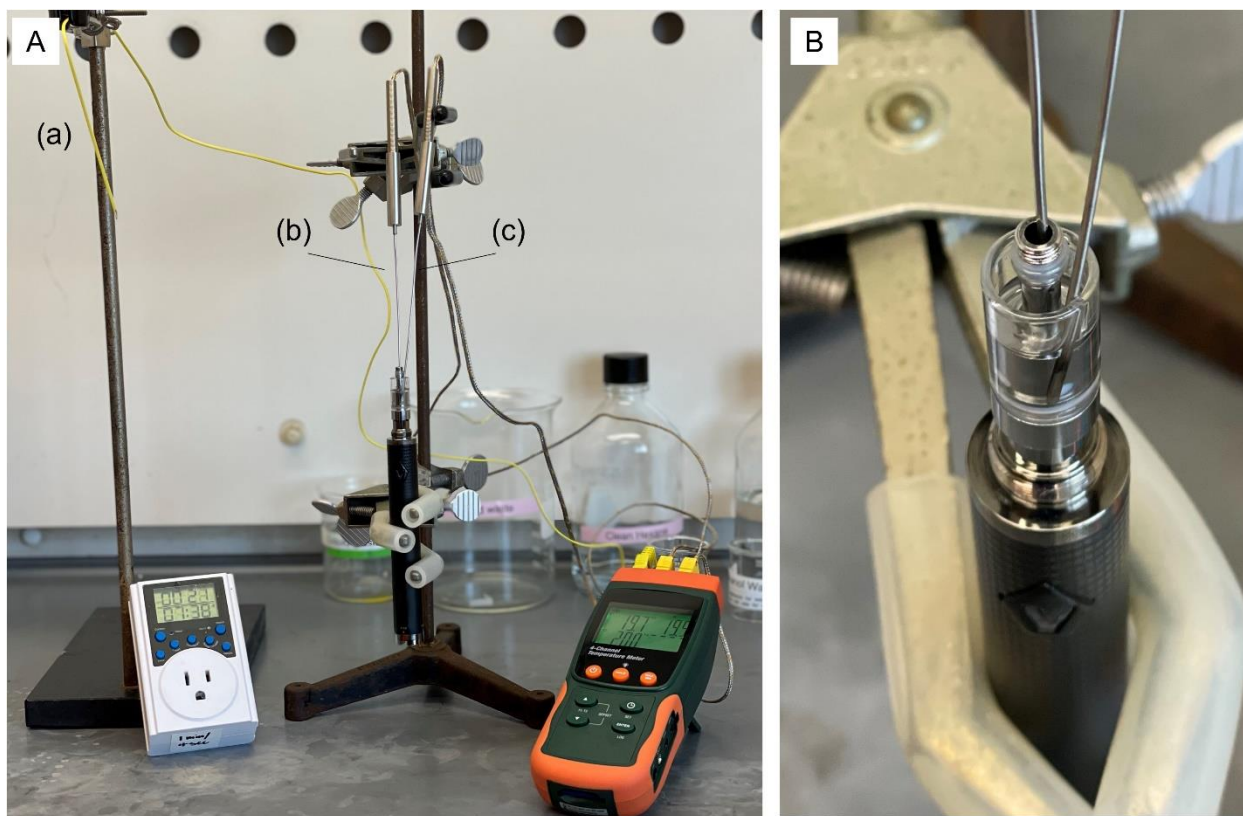

12  
13 **Fig S1. Set up of e-cigarette temperature measurements.** (A) Set-up of temperature  
14 measurements. Set up of e-cigarette temperature measurements. Three k-type thermocouple wires  
15 were connected to a data logger, which recorded the temperature of (a) ambient air, (b) the ceramic  
16 coil of the e-cigarette cartridge, and (c) VEA oil in contact with the atomizer tube every 1s. (B)  
17 Close up of thermocouples inserted into the cartridge.

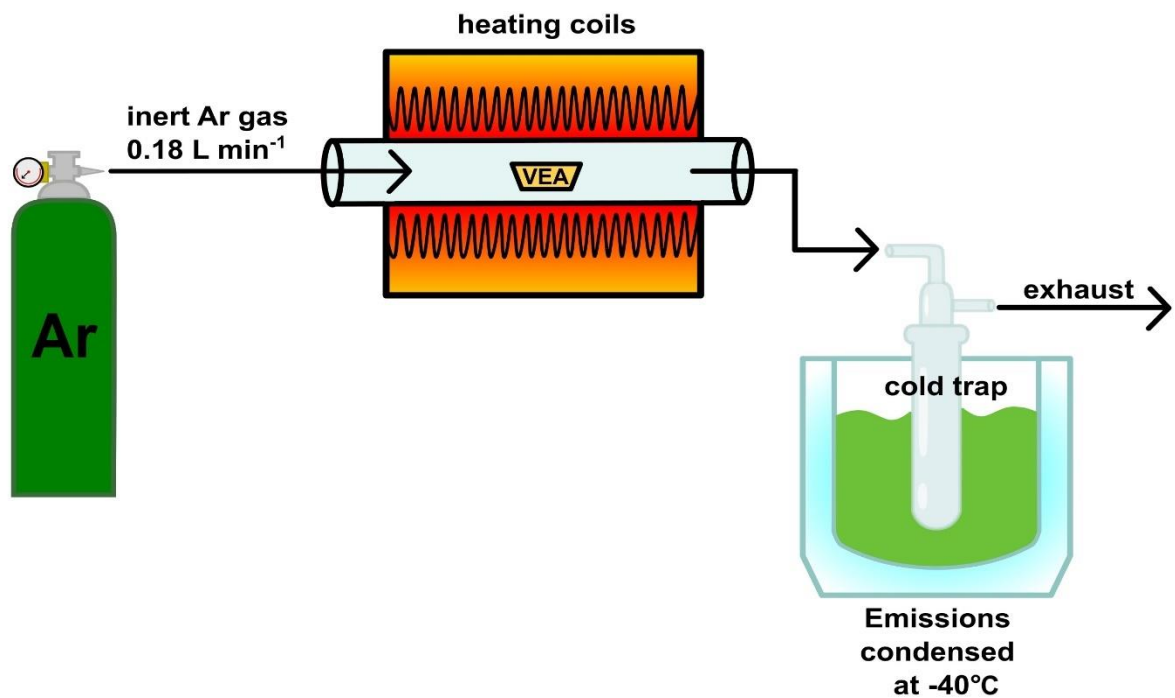

18

19 **Fig S2. Schematic diagram of a high temperature quartz tube-furnace system.** Gas flow is  
20 regulated by a 0.18 L min<sup>-1</sup> critical orifice and argon gas is delivered into the quartz tube by a gas  
21 tank. Pyrolysis of VEA occurs as the furnace is heated by heating coils and generated aerosol is  
22 carried into a cold trap. The exhaust is removed via fume extractor.



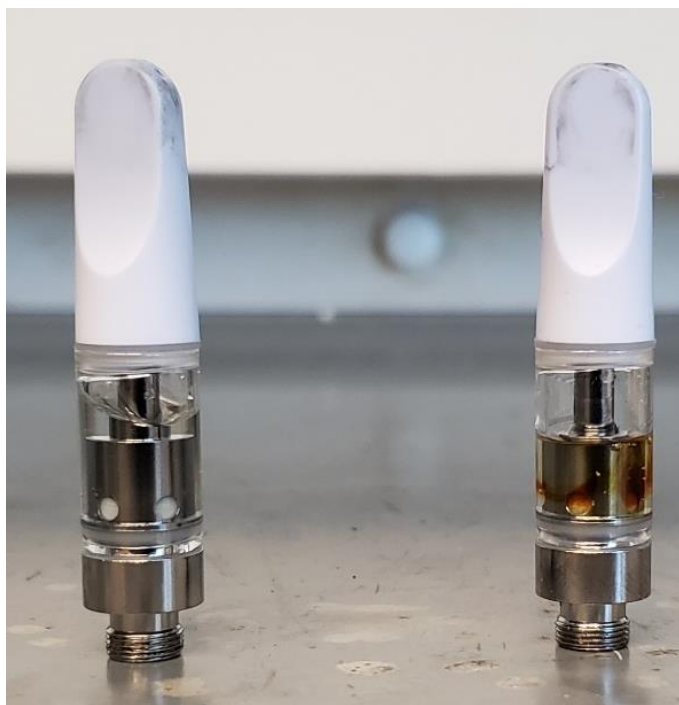

23

24 **Fig S3. Cartridges heated at 176 and 356 °C.** Visible degradation and discoloration could be  
25 seen in the cartridge heated at 356 °C (right) versus the cartridge heated at 176 °C (left) after 13  
26 cycles of 4s battery activation during temperature measurements.

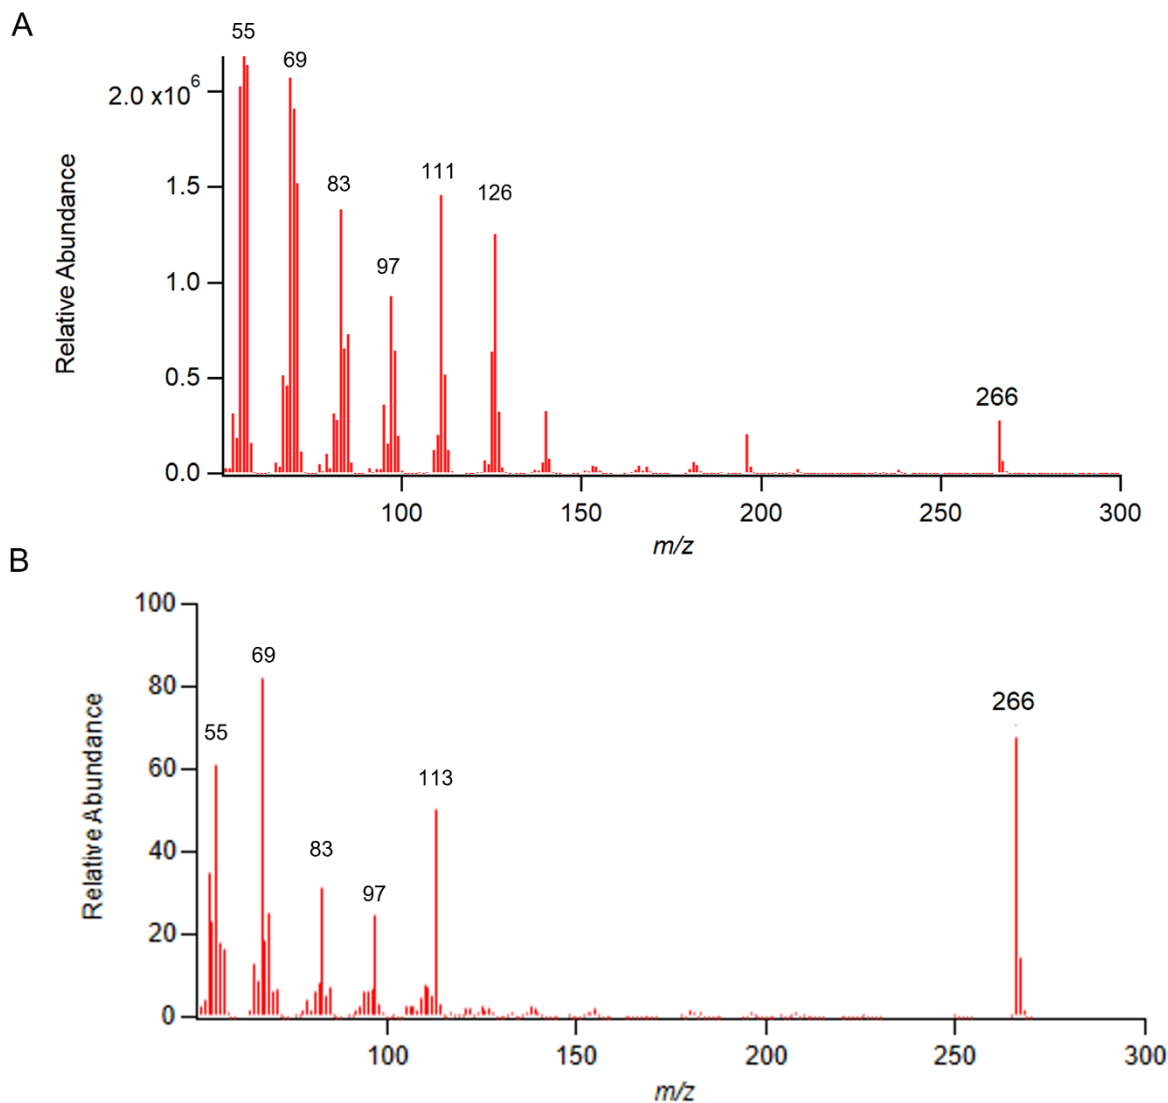

27  
 28 **Fig S4. Comparison of mass spectra for 1-pristene identification.** (A) Experimental mass  
 29 spectrum obtained from vaping of VEA containing signature fragments with  $m/z$ : 266 (consistent  
 30 with the molecular ion of 1-pristene), 111, 126, 97, 83, 69, 55. These identified fragments are  
 31 consistent with the experimental mass spectrum identified as 1-pristene by Mikheev et al (4). (B)  
 32 Simulated mass spectrum of 1-pristene obtained using QCEIMS containing signature fragments  
 33 of  $m/z$ : 266, 111, 97, 83, 69, and 55.

34

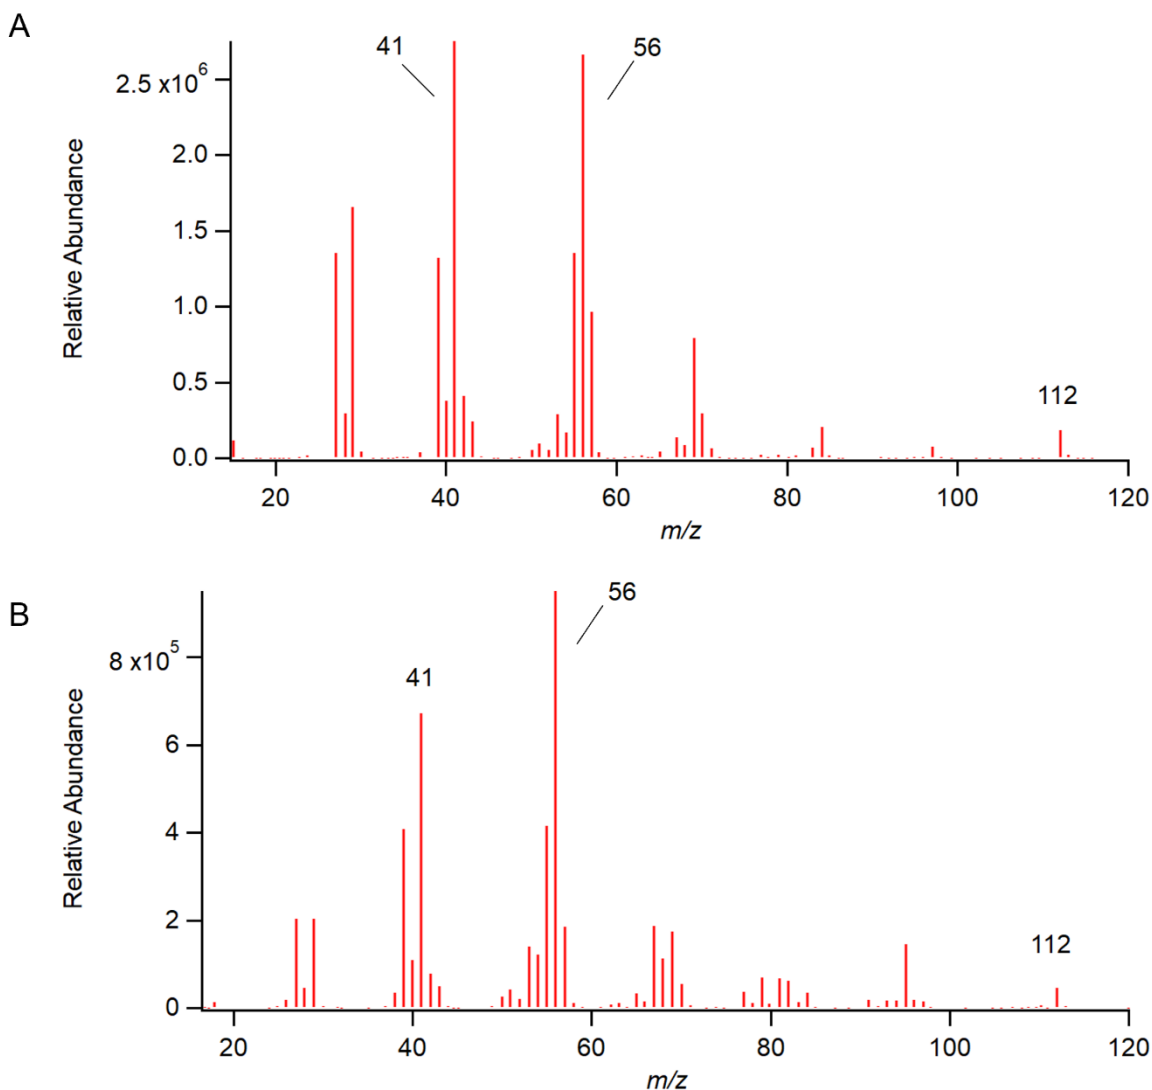

35

36 **Fig S5. Comparison of mass spectra for 2-methyl-1-heptene identification** (A) Experimental  
 37 mass spectrum obtained from vapping of VEA containing signature fragments with  $m/z$ : 41, 56, and  
 38 112, consistent with 2-methyl-1-heptene. (B) Mass spectrum of authentic 2-methyl-1-heptene  
 39 standard containing  $m/z$ : 41, 56, 112.

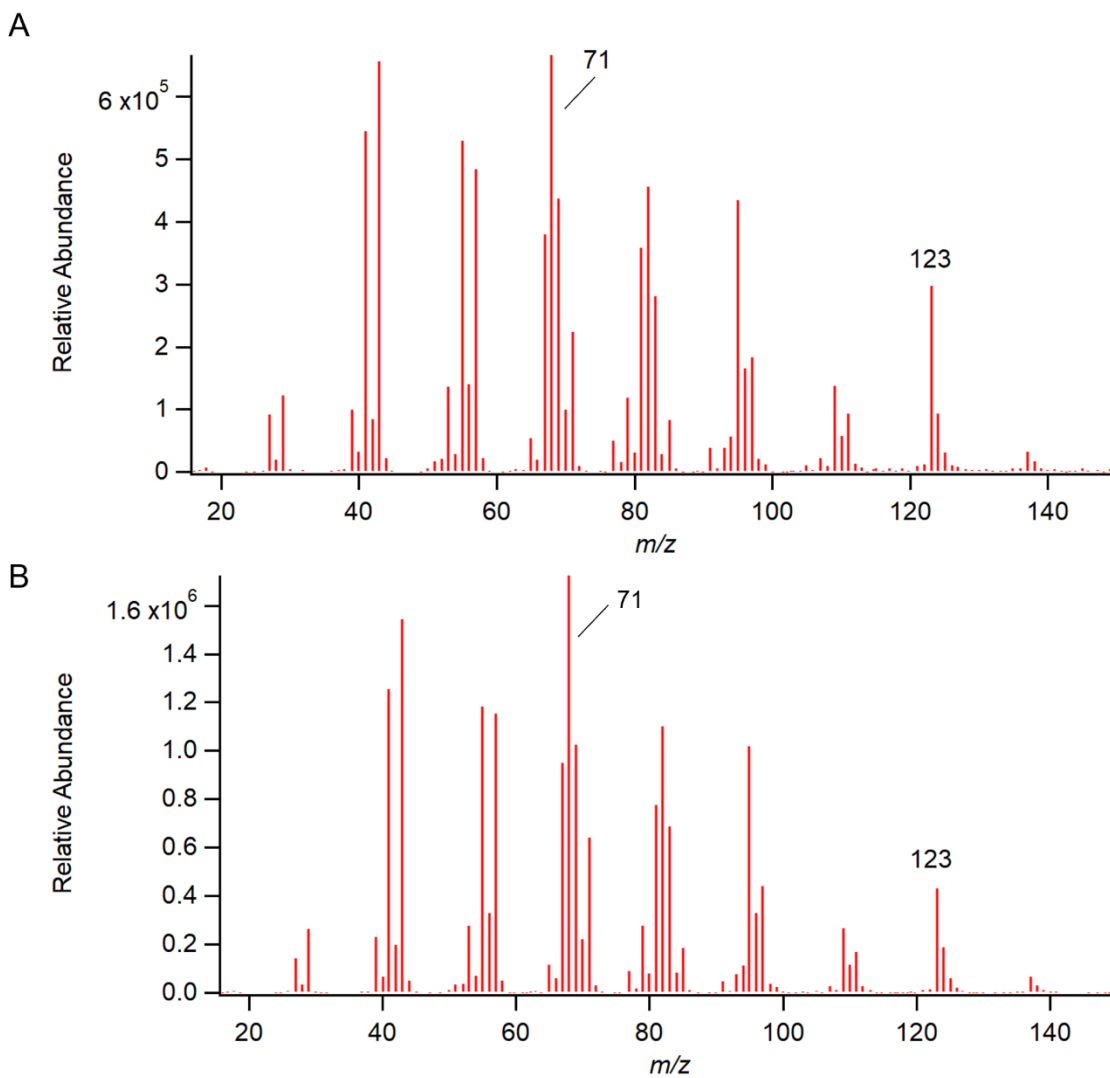

40

41 **Fig S6. Comparison of mass spectra for phytol identification.** (A) Experimental mass spectrum  
 42 obtained from vaping of VEA containing signature fragments with  $m/z$ : 123 and 71, consistent  
 43 with the natural isomer of phytol. (B) Mass spectrum of authentic phytol standard (natural isomer)  
 44 containing  $m/z$ : 123 and 71.

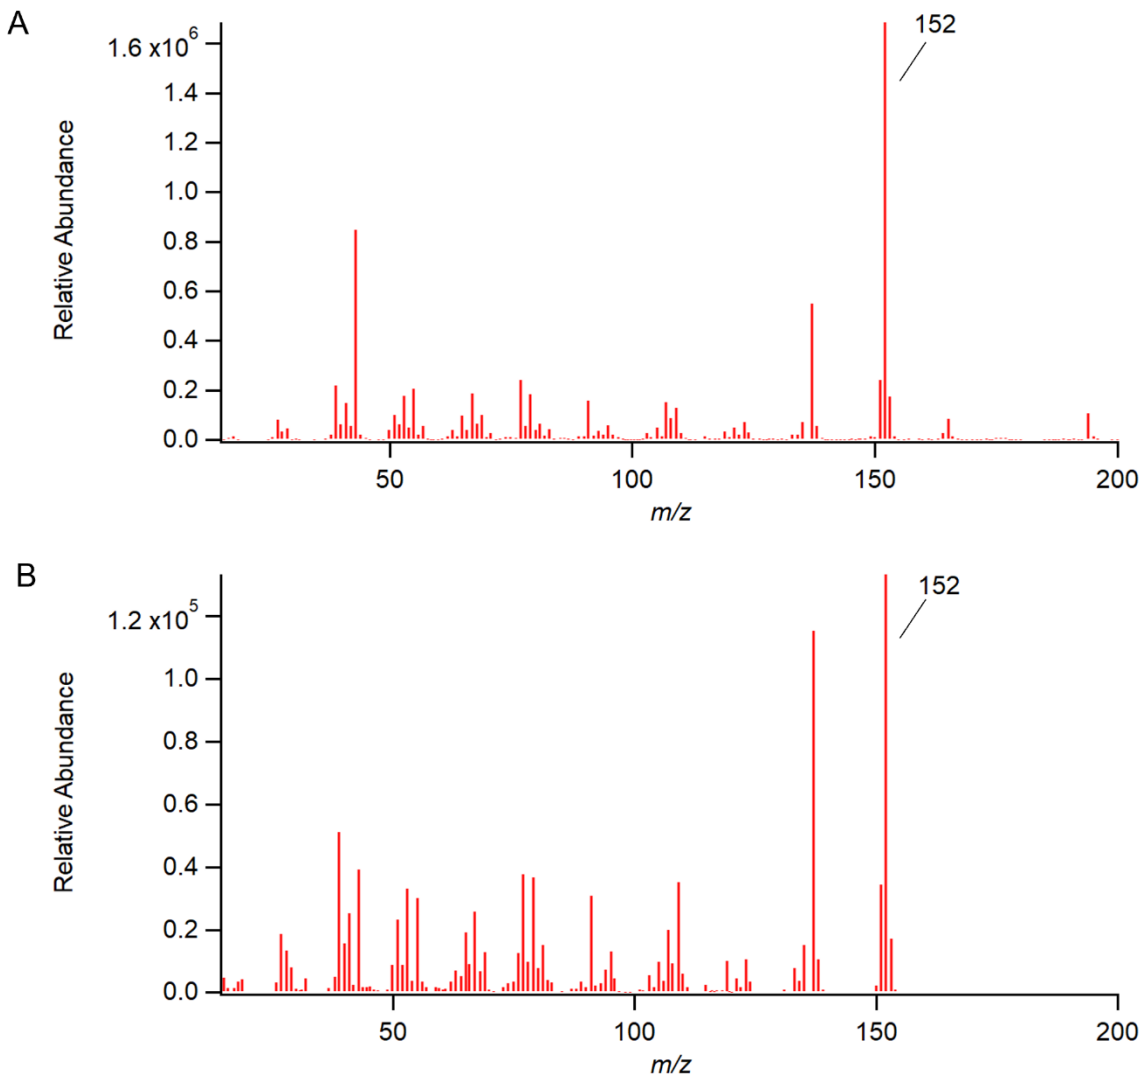

45

46 **Fig S7. Comparison of mass spectra for 2,3,5-trimethyl-1,4-benzenediol identification. (A)**

47 Experimental mass spectrum obtained from vaping of VEA containing signature fragments with

48  $m/z$ : 152, consistent with 2,3,5-trimethyl-1,4-benzenediol. (B) Mass spectrum of authentic 2,3,5-

49 trimethyl-1,4-benzenediol standard containing  $m/z$ : 152.

50

## 51 **References**

52

53 1. Grimme S. Towards First Principles Calculation of Electron Impact Mass Spectra of  
54 Molecules. *Angewandte Chemie International Edition*. 2013;52(24):6306-12.

55 2. Koopman J, Grimme S. Calculation of Electron Ionization Mass Spectra with  
56 Semiempirical GFNn-xTB Methods. *ACS Omega*. 2019;4(12):15120-33.

57 3. Kim S, Thiessen PA, Bolton EE, Chen J, Fu G, Gindulyte A, et al. PubChem Substance  
58 and Compound databases. *Nucleic Acids Res*. 2016;44(D1):D1202-D13.

59
